# Supplementary material
Source: PubMed Central journal article supplement (PMC5923073)
Supplement: JVI.02043-17_zjv010183530s1.pdf [file JVI.02043-17_zjv010183530s1.pdf]

## Data S1. The consensus sequences reconstructed for ERPVs

### The consensus sequence of Pglav\_1

#### #Nucleotide sequence

>Pglav\_1 (7,421 bps)

#### ORF1→

```
CAATGTGAAAATGTCCTTATAAAGAAATGAAACAGAAAGCAGTAGAAGAAAGTCAGAATGCTAAAA
ATGAAATATCAACTATTTCTCGTCTGTTTGGTTCAATGAGAATGCGTGATGTGAATAGTTTCAAT
AAAGTATATAAAGAAGAAAAGCCTCTCCCTAGGTGAAACTTCCTAAGTTATCTGCTAAAGATAT
TTATGATGATATGCCTATGTTTCAACTACGTGCATCTTCTCAATTTAAAATCATTGAAACAGTCT
CTGAAGTCCAACAAAATGCATCTGATCATTGTATTATCCCTACCTTAGACCCTGATGAAATTAGG
ATTGAAGCCAAAAATCCAGAGAAAACCTTCCTACATCTCGGATGTATCAGAATAGGCATTGAACC
TCTGCACAGAGCTGGTATACCTGCATTCGCTCTTATTGTGTGCTTGATAATCGTTTCAACAAAT
TTGTCCATGCTCTAATAGGAGGGGTACAAGGTGATCTTGGCCAGAGGCCCTATCTGGTTTGACTGT
CATCCAAATTTTCAAGAGTTTCTGTCACTGACCCAAACCTCAAAGATATATTGCAAGTCAAGGTTCT
CACCAAAGGATATGATATGAAGCCTAGTTCTGAAAATATTGCAATCCATTATAAGTTGGCACTCA
GATATACTAACACTCTCTGTCCAACAGTTTTCATGCACCTGATAGAGATTCAGAGAGTTCTACC
TTAGTATATACCTCTGCAGACAATGCCAACTTGTTCCTCCCAAGCCATTTTCATGGGAACAATTAGA
TTTTCTACTGAATGGGTAGTGCAGGCTCCTAAGCCCTCACCCCAAATTAATCTCAATACTGCAG
ATATTGCAGAAGATCATACTCAAGCAGTTATTCAGTTTCTCCAAGAAGGTTTGTCTCTTCTAAG
TCATCATATCCTGCATCACATAACCAGACCTGAATGTTCTCACACTCCCATTTTTCAATGGCC
ACCCATTCAGGACTCATCCAATGCCCTTTATGCTCTGCTCTTGTCTCTAACCAGTCYTCFCAGA
GCAGCCAACGTGGTGAAGTATTTTTAACTTTCCATCTACATCTTCTTTTCCATCTCCAAAATTT
GAAGGCATAGATCCACCCATTTGTACTCATGAACCCATCTGGATGGCACCCACTTCTATTCTTCC
AAGACAATGTCCTCTATGCCTTAAGATGGTCAATACCCAACCTCAAGTATGCTCTCCTATACATA
AAAACCATAATCCCAGAAGTGATTATCCTCCAGCCTCGATCTCAAAGAAAGTTGTCTCATCCA
AAGTGTCTGATACAACAGACATAGATTTTTCCACATGAAAGCCATGTCTTAATGATGCATCATAT
TCCTGAGCTAGAAACAGATGATCCTAGACTCAGAGAAATATTTAGCTACTGTAGACCACCGGGAA
CTCCAAGATATGGATTAGGGTATATTGAACAAACAGATGCAATAATTCCATCCTGCAGATTTGAA
AATCCATTACCCACAGGACTACAAAACCATCAGTCCAGAGATGCACAAATTAATTTCCCTTAT
GAATGGATGTCCTAGAAGAAGAGTAAACATAGACTGGATTAAGAGAATGTTAAATTGGGATCTGT
TTACTCATCCCAAGCCAAAGAATTTAATGCCACTACTTCTGCAGAACTAAAGAAAGATTTATCT
GAGCAATGGAAAACATATATGTCAATAAAGGATTTGTGGATATCCTTTTATGAATGGTACAAACT
TTCCCAAAAGGAAGCAATTCAAATGATGTCTTCCAAAGAAAGTGTGAGTACCAAACACAAATGGA
AAGCCTTAGATGGACAAACAACCTGAGACATATTTTCTTTTCCCCCTTTTAAAGGAATCATTCTA
GGAGAAGAGGAAAACAAACTAAGGCTACTCCCCTCATGATTCACAAGGAAGAATCTCAACAAAC
AAATTCAGAGAAAAGACTCCAAAGTGTGTCTGAACAGTTAAATTTGGACAAATACTTCTCTAAGAG
GGATGGAAGCACATACTTTTGTAAACCAATGACTATGCTAGAAAGCAACAAATAGATCAACTTCAA
GTCTCTACAAATCAAGTTGCTTCCAGTATAAACTCTGTCAATTCCCAAGTCTCTGAAATCAAAAA
CACTTTAGAAAGTGA AAAAGACTCTTCAAAAAGAGACCATGAAGAATAATGGAAGGATTAGGTG
AAGCTTTTAAAGACATAGGGGAATCTATTATTAAAGTATCAGAAAAATATGGAAAGCTTCTGAC
AAACCAATTCCTAGTTCTTACTTATTTCCACAAAAGGTCTCATCAGTAAACTCTACAGTCTACAT
TCCTGAAGAACTGATTTGAAGAAAAGGTTTCCAGTCCATTTTCCCCCAGAACAAGAAGAATCAT
```

CCTCAACTCATCTTCTGGTTACACAATCTCATATTCTCCCTGCTAAAGAACCAGTTCCTTGGAAC  
ATGACTAGGGTTCAGCTCCAGACCTTTATGGAAAAGGAAAGCTACCAGAGGCACAAACATTTAC  
AGATGAAAATTTCCAGAATGGAACATAGATAGTATGACCACAGGCCAAATCCGTCAAGTTATAG  
ACATAATGTATGTTTCTACAGAGTCATGTGCATGAAAGGGAAAAATGAAATAGAAGCATGTAAG  
TCTATTATACAATGTTTTACAGGAACTTTGGCTAAATGGTGGGAAATAGAGTCTTCACCTGCCCT  
AGTTGAGAAAATGGAAAAGGAACAAGTTAAAGATGAAAATGGGGATATAGTATTTAAAGAAGATG  
GCCAAGCAGAAAATAATATGATAGGTGCATTAACTACATTCATTCTTGAGCATTGGTGTGGAACA  
GAACATGAACTCTCTGATAAACATGCCATAATTCTAATGGGAATGAAATGTAAGAGAATGTCCAA  
TTATGATGATTTTACAGAGAATGGACCCAAAGGATATATGAGGTAAAAGATAGCAAAAACCTTC  
TCTGGAAGCAAGTATATCTTGCTTCTCTCCCCAACAAATTTGTTGAATATTTAAAAGTACAAAA  
TCTTTTGTTCACCTTATGAGCTTTATACTTGGGGAGAAAATTTACACAATCATTACCTCTGCCCT  
AGTAGGATTGTGTGCTAACATGAAGGTTACAAAGTCAATACAAAAGCTATCAAAATTACCAGATA  
GTAGATCTATCTGCGAAAAATATGGTATGACCCTAGATGACCCAGTTAGAAGAAAAGAAAAGGAA  
AAGAAATCCATGAGACAAAGATTCAAAAATATGATAAGGGAAAGCCCAAGTCTTACCAAAAAGA  
TAAGAGGAAAATAGGTCATTATAAGAAATACACAAAGTCTCATTATTACTCCCAGAAGACATCA  
AATTGCAATCTTCCAAACAACAAAGTAAGGCCAACCTAACTGTTGGTTATGTGGACAACCAGGA  
CACCTGGCTAATAGATGTCCACAAGGAGAACAATCCAAGAAGAATAAAGGTAAGATCTCACAACA  
AAAGGCAAGACAAAAGGTTGAGTCTTCTAGGAAAATAATCTCAATTCGCTGCAACAGATGTGGCT  
CAAGTCACCATGATACAAATCAATGCCACATCATCCTTTTCTAAGAGGGAAGAAGTTCATATG  
CTTCAGGAAGGATGTTGTGCTACTGACACTTCTGAATTTGAATATTTCTCTAGTGAATCCTC  
TGATGAAGAAATGTTACTTATAGAAAATGATTGCAGCTGTAAAGATCCAAAGTTTTGTATTTTCC  
AGACAGAGTCTTCAAGTTATGAAGAAACAAAAGATGAAGAAGAAGAAGATGAAGATGAACCA  
GAACCTAAAATATGTATGGCTCAAAAATCAGTCTGATGGAGATGCTCAGATGCTGGCACAAATCAA  
AGCATTTCAGAAAGGAGAAATGAAGGCTGCACTTTTAGATTCATTTCTAAAAACCATGGTAAAAT  
CTCAACAACCAACAACAACCACAACTCAGGTAAGAAGCCATTGTTTCATAGATGCTTCTTTTGAA  
AGGAATACCAAGTCATTTATTAGACAAAACCAGAATGATAAGATGAGACCTTTGACTATAAATGA  
TTTGGGAAAAGAAATAAATATTCTTAAGAAGGAAGTTGCAGAAAATAAAGCAAAGATTAGAAAAGA  
TTGAAAAAGAATCAGAAATTTGAGGATGGATACAAAGTTGATTCATGGGCTAGACAAGAAAATAAGA  
GGGTTACAACAACAAATCCAGGCCCTGCAATTCATGCCTTCCCTAGAAGAAATTCCTCAGAATGC  
AAATGCCAACATTAGTACATTTGAAACAAATTCATAGAAAGGTTTGAATTCATAGAAATAATGG  
CCATCCAACATCAACAATATCATGTGATGATTAAGCTGAATATTCAGGTCAAATCTTTAAGTTG  
AAAGCATTGATCGATTGAGGATCAGATTTTAAACATCCTAAATAAAGATTCTATTCTTCTTGTTA  
TTGGTTAAAAAATAACAATGCAGCCATTGGGCTAGGTAATCAAACCCTAAAGATGGAAATGAAG  
TTGAAAGGGTCAAGTTATGTTTTGGACCTTACTGCTTGAATCTGAAGTTTTCACTTGCAGAAAT  
CCAGTACCTTGTCTTTTAGGTAATCCATTTTTGGTTGTTGTTGAACCACATGGTTCTGAAAAAT  
ACCAAAATGGAAAATCTGGATATTTTATTACAATAGCAAGGAGAAAAATTTGACTCCCATTTGTAT  
CAGTCCCCTAAGTTGTCCACAATGGTTCAAATGTCTCAGACTCTTATAGAGAAAGAGAAAAAGATT  
CAAGAACTCCAACAATGAAGAGCAACCAGAGGATTGATCAACAACCTCAAGGAGCTAAAGATTCA  
AGACAGGATTAGTCAACTGCAAAAAATATTTGAAGATCAGGTATGCTCAGAACTCCCAACTGCAT  
TTTGGGAAAAGAAAACCTCATTGTTGAAATACCATACAAAAGATAGCTATGAGGGAAAAACCTTGT  
AAAAGCAGAGCAATACCTATGAATGCTAAATATCAGAAAATGTGTTCTGAAGAAATCCAAGGATT  
ATTGAAAAAAGGATTGATCAGAGAATCCATTAGCCCATGGAATTGCTATGGATTCTATGTTAATA  
AACATTCTGAGCAGATTGAGGAGTCCCAAGATTGGTAGTAACTATACTCCTTTAAATTCAGTC  
CTAGCTGATGATACTTATCCTATACCCACAAATCCAGTCTGGTCAATAGAATAGAAAATGCAAA

GATATTCTCAAAGTTTGATTTAAAAATCTGGATTTTGGCAAGTGGCTATAAAGGAGGAAGACAAAT  
TCAAAACTGCATTTAGTGTTCCTGCAGGTCACACTATGAATGGAATGTTATGCCCTTCGGCCTTAAG  
AATGCTCCGAAAAAATTTCAAAGGGTTATGGATGACACTTTAAAGGCATATTTTGACTGGCTAAT  
TGTCTACATAGATGATATATTAGTCTTCTCAGATTCCATAGACCAACATTTCAAGCATTTGGAGA  
TGTTTTTAAAGGTCATCAAACAGTCTGGTCTAGTTCTTTCTAAAAAGAAAATGGAGCTCTTTAAA  
ACCTCTGTCAAATTTCTAGGTACACAAATTTCAAATGGCCAAAATTTCTCTTCAGACCCATGCAGT  
GGAATTTGCAGAAAAATTTCCAGACAAAATAACTGATAAGACCCAACCTCCAACGCTTTCTAGGAA  
GCTTGAACATATGTCAGTCATTTTTATAAAGATTGTGCTAAAGATAGAAAAATTATGAATGACAGG  
CTCAAAAAGGATCCTATGCCTTGGACTGAAGCACACACTGAGGCTGTGAGAAAAATAAAAATCTAA  
AGTCAGGCACCTTGCCAATACTGCATGTTGCAAGTGATGAACTCTTTAAAATTGTTGAGTCTGATG  
CCAGTGACCAAGGATGGGGAGCAGTTCTTAAACAAGTTAAGGCAGGGAGATCAAAGCCACATGAA  
GAAATCATACAATTTGCTTCAGGGACCTGGCTTGACAAYGAAAAGAACTATGCAACAATTGACAA  
AGAAAATAAGGCAGCCCTCAATGCAATCAATAAGTTTGAAATCTATCTCATCAATAAAAAAATTA  
TGCTCAGAACTGATGTTGTTGCAATGAACAAGGTGTTACATAAGAAAATCACTAAAGCAAGTGAA  
GCAAAAATTTGCAAGATGGCAAGCTCTATTTGCAAAATTTTGATTTTGATATTGAACACATCAAAGG  
CTCTGAAAATTTCTATCCCTGATTTTCTCAGTAGAGAAAACCTTCAAGCGAGCGTGAAAAACAAGA  
GGAGGGAACAAGCGAGCGAGGACAAGCGAACRTGGTTACAAAACAAGAAAGATCAAATGCAGAAA  
**ORF2**→ **←ORF1**  
GCCATTGTCTGGTTCATTGTTACTGAATGGAAAAATGGAGGTGAACAAATAAGGAATATCCCAGAC

AATGAAGATTGGGAAGTATATGCCCAATTATGGAAACCTACATGGAAACTCAGAAGAACTGAAGT  
TCTCGATATGAATTTGCAGCCAATTCATCTCCTACCAAATATGTTCCAGAACTCAGAAGAATCC  
CATTTTATACTGGAAACATTTCCAGACATGCTTTATGACAGATCGACCAGAGCTGCAGCTGATGCT  
ACTTCAACTTTATGCTACACCTTCAGAGATATAAACTTGATTTGGMAACAGTTTAATAATAATAC  
AGGATTATGTCATCAATATTTTTTCACTTGATAGACCCCGCTCCTATGCTCTTTGGCCAGATCAAG  
ATCCCACACAGAAGTTCTTCGGAACATACATGAATTACAGTGAATACAAAAAGGCATGGTGGAAAT  
TTTCTCAGGAAAGAGAATAGGAATAAGACATATTTACATTTATTGAAATTCAGAAGTGATATATAC  
TAGTATGAGGGGATTATATCATGTTTGGCTATCAGATTGGTGGAGAGACTTCGGCATCAACAAAA  
GCGCAGTGGACCCAACATACTTAAATATAGAATGCACAACCAAAGATATTCCACTAAGAGAAATC  
TGTGATCTCTTTGAATCTGACAGAATTAAGTATGACATGATCTTGTCAATGTATGCAACTCATCA  
TCTCCAATGGCTTGAAAAACGAGAATCTCTGCACAATCATCCAAGGACGAACAATCATAGTAC  
GTAAGCTTTACTCAAAATCTTGGGAAACTGGTGGAGGCTATTCCAACAATATAATATGGGGATG

**←ORF2**  
TTTTGTGATCATGACTAATATCTTCTCCGTATGATTTTCTTTTCATGCAAATCCTTAGAACTCAG  
AGCACTTCTCCGACGTTTTGGTGCGGTTTTGACCCACATTTCAAGGAATCTATTGGAAAGTAAAGCA  
TTTACGGAAAATATTGTCAGTCTGTACTAAAAGAGTTTGTGACCATTCAGGATGATTCTTGCAC  
GTTTTCGTCGGT

**#Protein sequences**

> Pglav\_1 (ORF1)  
MSYKEMKQKAVEESQNAKNEISTISR LFGSMRMRDVNSFNKVYKEEKPLPRWKLPLKLSAKDIYDD  
MPMFQLRASSQFKI IETVSEVQQNASDHCI IPTLDPDEIRIEAKKSRENFLHLGCIRIGIEPLHR  
AGIPAFALIVVLDNRFNKFVHALIGGVQDGLARGPIWFDCHPNFRVSVTDPNLKDI LQVKVLTKG  
YDMKPSSENIAIHYKLALRYTNTLCPTVLHAPDRDSESSTLVYTSADNAKLVPQAI SWEQLDFPT

EWVVQAPKPSQITLNTADIAEDHTQAVIQFPPRRFVSSKSSYPASHTTRPECSHTPIFQWPPI P  
GLIQCP LCSALVSNQ?SQSSQRGEVFLNFPSTSSFPSPKFEGIDPPIC THEPIWMAPPSILPRQC  
PLCLKM VNTQPQVCSP IHKNHNPRSDYPPASISKESCPHPKCSDTTDDI DFPHESHVLMHHIPEL  
ETDDPRLREIFSYCRPPGT PRYGLGYIEQTDAIIPSCRFENPLPTGLQKPSVPEMHKLFSLMNGC  
PRRRVNIDWIKRMLNWDLFTHPQAKEFNATTS AELKKDLSEQWKTYMSIKDLWISFYEWYKLSQK  
EAIQMSSKESVSTKHKWKALDGQTTETYFPFPFKGIILGEEKQTKATPLMIHKEESQQTNSE  
KRLQSVSEQLNWTNTSLRGMEAHTFVTNDYARKQQIDQLQVSTNQVASSINSVNSQVSEIKNTLE  
SEKDSSKR DHEELMEGLGEAFKNIGESI I KVSEKYGKLPDKPI PSSYLFPQKVSSVNSTVYIPEE  
TDLKKRFPVHFPPEQEESSTHLLVTQSHILPAKEPVPWNMTRVPAPDLYGKGKLEAQTFTDEN  
FPENVIDSMTTGQIRQVIDIMYVSYRVMCMKGKNEIEACKSIIQCFTGTLAKWWEIESSPALVEK  
MEKEQVKDENGDIVFKEDGQAENNMIGALTTFILEHWCGTEHELSDKHAIILMGMKCKRMSNYDD  
FHREWTQRIYEVKDSKNLLWKQVYLASLPNKFVEYLKVQKSFVQPYELYTWGEIYTIITSALVGL  
CANMKVTKSIQKLSKLPDSRSICEKYGMTLDDPVRKKREKKS MRQRFQKYDKGKPKSYQKDKRK  
IGHYKKYTKSHYSPEDIKLOSSKQQSKANLTCWLCGQPGHLANRCPQGEQSKKNKGKISQQKAR  
QKVESSRKIISIRCNRGSSHHDTNQC PHHPFKREEVHMLQEGCCQSTDTSEFEYFSSESSDEE  
MLLIENDCCKDPKFCIFQTESSSYEETKDEEEEEDEDEPEPKICMAQNQSDGDAQMLAQIKAFP  
EGEMKAALLDSFLKTMVKSQQPTTTTNSGKKPLFIDASFERNTKSFIRQNQNDKMRPLTINDLGK  
EINILKKEVAEIKQRLEKIEKESEIEDGYKVDSWARQEIRGLQQQIQALQFMPSLEEIPQANAN  
ISTFETNSIEGLNSMRIMAIQHQQYHVMIKLNIQGQIFK LKALIDSGSDFNILNKDSIPSCYWLK  
NNNAAILGNQTLKMEYEVERVKLCFGPYCLNLKFLSLAEIPVPCLLGTPFLVVVEPHGSEKLPNG  
KSGYFITIARRKIVLPFVSVPKLSTMVQMSQT LIEKEKKIQELQQMKS NRIDQQLKELKIQDRI  
SQLQKIFEDQVCSELPTAFWERKTHFVELPYKDSYEGKPKSRAIPMNAKYQKLCSEEIQGLLKK  
GLIRESISPWN CYGFYV NKHSEQIRGVPRLVVNYTPLNSVLADDTYPIPHKSSLVNRIENAKIFS  
KFDLKS GFVQVAIKEEDKFKTAFSVPAGHYEWNVMPFGLKNAPKFKQRVMDDTLKAYFDWLIVYI  
DDILVFSDSIDQHFHLEMF LKVIKQSGLVLSKKKMELFKTSVKFLGHTISNGQISLQTHAVEFA  
EKFPDKITDKTQLQRFLGSLNYVSHFYKDCAKDRKIMNDR LKKDMPWTEAHTEA VRKIKSKVRH  
LPILHVASDELFKIVESDASDQGWGAVLKQVKAGRSKPHEEIIQFASGTWLD?EKNYATIDKEIK  
AALNAINKFEIYLINKKIMLR TDVVAMNKVLHKKITKASEAKFARWQALFANFD FDI EHIKSEN  
SIPDFLSRENLQASVK?KRREQASEDKR?WLQNKKDQMOKAIVWSLLLNGKMEVNK\*

>Pglav\_1 (ORF2)

LVIVTEWKNNGGEQIRNIPDNEDWEVYAQLWKPTWKLRRTEVLDMNLQPIHLLPNYVPELRRIPFY  
TGNIPDMLYDRSTRAAADATSTLCYTFRDINLIW?QFNNTGLCHQYFSLDRPRSALWPDQDPT  
QKFFGT YMNYSYKKA WNF LRKENRNKTYFTLLKFRSVYTS MRGLYHVWLSDWWRDFGINKSAV  
DPTYLNIECTTKDIPLREICDLFESDRITDDMILSMYATHHLQWLVKTRISAQSFQGR TIIVRKL  
YKSWETGGGYSQQYNMGMFCDHD\*

## The consensus sequence of PglA<sub>V</sub>\_2

### #Nucleotide sequence

>PglA<sub>V</sub>\_2 (6,987 bps)

TGGTATCAGAGCCATAAGTGTGTCTGTCGAGATAGTTTCTGCCTGAGCAGTCGGCCAAGAGCCT  
GTCTAATCTCTGTATCTTCAGAGACATAAGACTAAATGCCCTGCTTTTCTGTGCAGTTATATCTC  
AAGTCTTCAACAACATAACCTCCTGTATGTTATATGTAACAAGCTTACAGATTAATAAAAAATTAG  
TGTTTATGATGTGTCGTCATTTTGAATGAGCCTTGTATCTGAGAAAATCTGATTGTGAGACGTGC  
AAAGTCCGTTAAGGTGAAGTGATTTACTTCTAGTGGTTTCCAGCCGTCGTTGTAGGACGTGTAA  
GTCAGCTTTTGGTGCCATGTGAAGGCTTGTGCTGCAAAAGTCCTGTTCCCATTTGTAAGTGAATC  
TTACCATTTTAACTTTTTCTTAGCTGCAATACTCAAAGGATTTTCGTCAGAAGTAGTAGTAATTC

→**ORF1**

TTAATGGCTACACCACAGGACACTTCTTCTCATGATCTGTCTGCTAAAGTTACTTATAAACCATC  
TAAGTGGTATGATAAGTTATTGAGTCAGTCTTCTTCTTCTCATAAACAATTATATAATACYMGGT  
TAATTGCYCAAGAGTATGAGYCAGAYCCTAACTGGCGDATGCCTCADATHCCGGCTTCTGADATC  
TATGATCTCCCTGTCTTTAAATTTCTGCTACTACTTTAAATACGTTATTGTTCTGTCAATGTACC  
GATCTCTCTCGGTCAGTCTGTTTATCAGATTCCTCTCATCCAAGAAGCCGATATCAATTGGGGAC  
TAGAAAAATGGCTATGAATATATHCATATCGGGTTAATCCAGTTTGGTATCAATCCTTTGGTTGCA  
CCAGGHCTTGATACCTCTGTGCTTACATGATTATTGACTCBCGTCATAATAATTTCCADGATGC  
CCTTATTTCTGGTTTCCAAGCCCCCTGTCATAATGGCCCTGTCTGGTCTTCTGCCTTACCTCGTT  
ATCAAGTTTCTCTBCGAGATCCTTATATTAAYTCCYTGTTACAAGCCTATGTCCAATTTGCTGGA  
TTTAATATGGCTGAAGGATCYAAAAATGCTCAGTTACATTTCTTCTATTTGCCTCCGTTTGTTC  
CACKACCATGCCWGCYCTYAATCCTAAWCTS YTGAAARCGCGYACTWSTGAAAGCGTGGTGGTTG  
GTCCCGGAAATGTWMTCCCYTAACTCTTGGKTTTTGYCAA YTAAGTAAAGARTGGTCT  
GCAGATTATGWTCCAATWTCTGCAMAAATTCWACCTCCTATGCCTAAAGAACNTCTGTWGAAC

**ORF2**→

TAAYGCTRMAGGWAAACCTGTTCTAAAGCTAGGAAGGTCTCAAAGYACMWGRATACAGGATCTTG  
ACAGACAATMTCTCATCTWTCTRCTAGYWCWTCAAGATCTGATTCTGCAAGACATACNNNNWGY

←**ORF1**

TAATAA YTCCTACTAAACACCCTGTATATAAACCTGTTGCTGGTAGATCTAAGTTAGATGATC  
ATCTACTAACWCACCAACAAGGTTCCAAAGATTGCTATTATTGTA AAAAGAAATTCCTACTCAG  
GAACCTTCTGTAAATTTCTGATCTAACCTCTTATCCATCTGTTCCTAAGA ACTTCAGAACCTAYCA  
GACCAAGGTTGAACATCATGGTCAACATRCAGATTGTTCTGAATGTCAAGATCTGGCAGTCCCTA  
CTATTA AAAATGTTTGACTCTCCATTACCAAGAAGTGGAAGAGATAAAAAGGACTGAACTACCATAC  
AGAAGTCTAGGTCCAGGGAATCACATCCCTAAATTC CAAAATGATATGGTAGCAGATCTCGATTT  
TATTA AAAATATAGAAATCAGATGCTGACCCTTCTCAAGATATAATTAGACTTCAAAAATTATTCTA  
ATTATCAATCTGTCTGCCTTGCKCAAATCTAGATGATATTGCACAAGATGTGATCAAAACAAAG  
ACTCATTTAAATGGATTACATTTCTGAAATTGATCAGATAGAACAGAATCAAGAAGAAATGAAGTC  
TCAGTTACATACTATTCTTGAGAAATTAGATATTATTGAAAAAGCAGTTGCTTCTTTGAAATCTT  
CTTATGAAGAAGAGTCAAGACCTTCTTCTCCAATACTAATACCTGACATAGCACAAAGATGCTACY  
TTTTCTTTGTTTGGTCTCTTGACTCTGMTGACCATAAAACAAC TAACTCTGAAGCAATTAGCTAC  
TAGTTTGTCTAATCCTACTTTAGCTAGAATAGCTGAAGTTTTACA ACTTGCTATTGAAAAGATTA

ATYTTGGTTAAAASCCAAATTACTGATCTAGAAAACCAGATTACTCAAGCYAAARCAGCAAGTCTA  
GCAAGCCAAC TAACAAAATTGTCCATTGTACMTATAACYTCACCTGATTCTTTTGTACAAAGTNT  
TTMAATAAAAAGCAATGGATGGAGAATCAAACCWACTGATTCTTCAGAAGAACCAAAACCATCCC  
CTGGTGAATCTTCTGGTACATCTTACCAGTCTGCATGGGAAAAATGGTGTAAATGCTAAGTACGGA  
GGAAATAARAAAGCMCCTATGGATATTGATGGTCAACCTACAACCTTCTATTAAACATGTTGATAA  
TGCCCCAATCTCTGATTTTGTAAATCTAAAACAGAGATTGAAAATATTATTCAAAGATGGC  
AATCATGGGCTAAAACACAAAAATGCTCCATAAAGATAAAGTCTCTTGGAGTGATATAGCCTTA  
CGAATTACTTGGGGTTTTGTAGGTAACCTAAATWTTTTGGTGGGAAAGAGTAACTCCTAGAAGTAA  
GCTCAGAATACTTGAACATGAAAAACCCGTGGATGAGCTTGTTAAAGCTGTTGTCCATGAATTCT  
ATGGAGATATAAAAATCAATATGAGTCATTATGCTGATCTTTATATGAATCAAAGATTATGCCAC  
CTTTCCAGTTGCCTAAATATTTCTGTACTATGCAAACCTCTCTTATATAAGGTACCTGATCCAAA  
TAATACWGCTTATCTGAGAAAAATTTATCCTCAATGCCTGGAAAAGTACCTGATCTTGTGAGAG  
AAAGATTAGAAGATTTAGAAAATGATATTTCTGAACTATCTCTTGCTGGTTTTACAAGAGCAAATT  
GTCCTGCTCTGCAAAAAGAATGTATGAGGAAGAAGACTGCAAAATCCTTAAAGAAACATYTAGG  
ATTTGATTCTTCAGTTTGTGAAGTTTTTACAGAAACATCTAGTTTTTGGATGTWATCAGAAGAARA  
AATCAAAGAAATGGTCTAAAAATGACTGTGGTTGTTCTGATTGTAATAATCATAAAAAAGAAAA  
TTTACTARGAAATATCCTCGTAAATTTTCTATACCTARAAGAAAAGTTTTTCTTTAAGAGAAGACC  
ACARAATGCTAGAGCCAAGCCTTCTTCATGCTTTATCTGTAAAAAGCCTGGCCACTGGGCATCTC  
AGTGTCTCTGCGGTCRAAGACRAAAGCCCAAAC TAAAAATATGGATTATTCTTAACTGGATAT  
GATCCAGCTGAATGGGACTTAGTCTCTAACCGTT CAGATGGTGAATACCTATCCCTTACTGAGGA

← ORF2

ORF3 →

TAGTGATTCTCTCTGGACCATGATTCTCCTCCTCNGAATGACCATCTCTCTGATTCTGATTCT  
TWCWCTTCCCAGYTTGGAAGCACTAAATTTTTTAGATATCAAAATGATGTCTTCTTTTGTAGATC  
TCAATTCTCTTCTCTCAGAGATCTACTCTCCAACATAAAMTGTGAGCTCTGACTCCTGGACAG  
TTTACCTTTCTGATCGMTATGCTTCTCAAATTGCACCTCTTACTGCTCAAATTGATGCCATCCA  
GCAGCCAAGCGTGGTGAATATTACCATTAYACTCCTACTGATGCTGAGTTTGTGCGACCAAAGC  
CTAAACCTATAACAACANANATACTTCTAAAGGAAAAGCTATAATTCCTTATTCTGCTTCTATT  
AAAGATGATGAATCTTTAGATAATACCATCTTTCATCTTGAAGAAGAAATTAGAGAAAAAGAAGC  
ATTAGTACAAGATTTATGGAAAACCTTGAATTAACAGAAAAGAAGATTAGAATATCTCAAAAAGA  
AAAGAGATGAAGAATTTGAAAAAGAGATATTCAATAAAGAGTCAGAAGCTGAATTCTTTGAAACT  
AAAATAGTCAAAGGCCTAGATGACAGATTAGTCATCTCTGTAAATATTAAGTCCAAGGATATCT  
GCAATATACCTTAGATGCACAATTAGATACTGGTGCAATGAATTCCTGTGCTAAACATGGAGCAA  
TACCTGAATATTATTGGCAGCCTGTAGATATATCTTTTAGAGCTGTCAATAAAACTGAATTAAG  
ATTAACATATAGCTCCAGATTTTCCCATWTACATACAGGAAGAAAAAGTACCAGTAACTCTATA  
TAGTTTTGATACAGGTGCAGATATACTTTTAGGMCAAGACTTTGTAATAAGTGTCTTCTTTAA  
CTGTAGGAAATAATTTGTACAGTTAACTATTAATGGCAAACCTTTGAAGATTCCAAGTAAATCT  
ACCTTTGAAACAAGAATTGCAGTAAAAGAACTACTCAACAAGTTGAAAAATCTGCTAGTAGTCT  
TGCACGAATCCAAAAGATAAATTGGACATGCTAATAAGCATGGAATGGAAATTATAAAAGAAATAA  
AAGAAAAGATAGAATCAGATTGTACATCTGATTATCCTAATGCCTTTTGGACCAGAGAGCAATAT  
TTTGTGCTGCTGCCATATAAAGAAGATTATATTCAGACCTCAAAAAGCCTCTGCTAATCATAT  
GTCTCCTACAGAACCTGAATATTGTCAAAGGAGATTGCAGAATTATTGGAAAGAAAAATTGATAG  
AAAATAGTAGAAGCCCTTGGGCATGTCTGCCTTTTATGTCAATAAACATAGTGAGCAGAAAAGA  
GAAAACCAAGAATGGTTATAAATTACAGAGCTTTAAATGAAGCTTTGTTACCTATAAGATTTCC

TTTGCCCTCTAAAGAATTATTATTTTCTAAGATTGGGAAATGTAATGTCTTCAGCAAGTTTGATC  
TGAAAAGTGGATTTTGGCAAATAGGSATTATACCTAAAGATAGATATAAAACTGCATTTGTTGTT  
CCTCAWGGACAATATCAATGGAAAGTTATGCCATTTGGTTTTGAAGAATGCTCCATCAGAATTCCA  
GAAAAGGATGGATGATATCTTCAAACATTTGAGTTTTGTMATTTGTATATATTGATGATTTACTAG  
TTTGCTCTGTAGATATGAAAACACATGTACAACATTTGAAGATTGTTTTATGATCTATTGTATAAA  
CATGGATTAGTGCTCAGTAAATCCAAGCTATGTTGGGCACAAAACAAAGATTGAATATCTTGGATT  
AATACTCTCCCAAGGAGAAGTAGAACCCAAGATCATGTTTTGAAGAAATTATCAGAATTCCTG  
ATGAAATCTGGACACAAAACAACACAAAGATTCTTGGATGTTTTAAATTATATCCGACAGTTC  
TATGAGAAAYCAAGCTAAAGATGTCCGGATATTACAGAAAAGATTAAGTAAAACAATACCATGGAA  
TTATAAAATGACACAAGCAGTCCAGATAATCAAGCAAAAAGATCCAGAATCTGCCAAAACACTACATC  
TTCCAGATATGTCATTTCCAATTAATACTTGAACCTGATGCCCTAATGAAACATGGGCAGCAGTT  
CTACTTCAGAAGAATGGTCTTAACTGGAAGAAGTATGTATATATACTTCTGGATGTTTCAGTGA  
TGCAGAGTCAAGATATCCTTCTTCTCACAAAGAAATCTTGCTGTCAAAAATGGCATCAAGAAAT  
TCAGGATGTTTTCTAAAACCTGTACATTTTTATTGTTAGAACAGATTTGAAACATATGAAAGGAATG  
CTTACTAATCAAAGATTGCTTGAACAGGGAAATAACAGAGTTCTGCGATGGAGCTTATGGCTTGA  
TGGATTTGATTTTGAATCCAATACAAGCCTGGAAAAGATAATTGCATTGCAGATCTACTTACAA

ORF4→

←ORF3

GAGAAGCCGCTCCTACAAAAGAAAAAGATAAAACAATTAATGGCTTCATCCTCCTTGAGCATAA  
GGGATGCTCCTCCACCAGGATTCAAATGGATCTTGGTCTGTAAAGATTGTAATATATTGTTATTGT  
TTTGAGTGTTTAGCTTGTGTATAAAGTCTAGTCCTGCTTGTATACATATTCTAGAAATTTGGAT  
ACAGACGTATAATCATTTTGAACATATGGTAGATATTTTAGAGATAGTAGAAATTTTRTTTAGAG  
GAATAATGACTGGAGGACCTTTCCAAGGACAAGTATATATATCCTATACACACCAGACATATCT  
TATGAAGATTACTGCAAGATCATGCTTCAAACAAAATATGATGGATCTTGCTGGATAACCTTTGA  
ATGTTCTTCATTCAAAGATTATTATTATTTCTGGTCTGGATGGTTATATATATTGTTCTGGACAT  
ATTGTCTTAGAGATGCTGATTTCTTCAAAAATACAAGTAAAGAAGCCTTCAAGCAATGGTTTCAA  
GCAGAAGTTCAAGAAGCTGCACATTATGAAGCATGGTTTTGTTTTCAATCTATCTTTTCATGGGAAG  
TGAACACATTATGAACAGACTGAACCATCTCAACCTCCTTGCTACAAAGTTACTAGTGATTATT  
TTGGTGACTTATGTGTACCTGAAGATGAACTGATTCCAGCTATGCAAGGATCACCTTTCTACAGA  
TGTTTTCAGTGGGCTTCTCCTTTTTTCAAATGATCACAGCTCTCCTCCTAGCAGTCATGATTATGA

ORF4←

TAGTGATTTCTCTTTTGGATTCTGTAGCTGAATATAATATAAAAAATAGAATGGAAGCATGATGGA  
CCCAGTTGTCTACTTTTGTAAATAAAGATATTCCTTTTCATGTCTATCGGGCCGACAGTGGTGTCC  
GACAGTTCCTGGGTTCTGTAGAACCACA

### #Protein sequences

>Pglav\_2 (ORF1)

MATPQDTSSHDLSAKVTKPSKWYDKLLSQSSSSHKQLYN??LI?QEYE??PNW?MP??PAS?IY  
DLPVFKFRATTLIRYCSVNVPI SLGQSVYQIPLIQEADINWGLENGY EY?HIGLIQFGINPLVRP  
?LDTSVLTCIID?RHNNF?DALISGFQAPLHNGPVWSSALPRYQVS?RDPYI?S?LQAYVQFAGF  
NMAEG?KIAQLHSSICLRFVS?TM??NP??R?T?ESVVVGPNG??P?TL?F?Q?TEIE?WSA  
DY?P?SA?I?PPMPKE?S?ET?A??KPVLKLGSRQ??IQDLDRQ?SH?S??SRSDSARH???

>Pglav\_2 (ORF2)

LTDN?LI??L??QDLILQDI??N?SPTKHPVYKPVAGRSKLDDHLL?HQQGSKDCYYCKKKFPT  
QEPSVNSDLTSYPSVPKNFRT?QTKVEHHGQH?DCSECQDLAVPTIKMFDSPLPRSGRDKRTELP  
YRSLGPGNHI PKFQNDMVADLDFIKYRKSADPSQDI IRLQNSNYQSVCL?QNLDDIAQDVIKT  
KTHLNGLHSEIDHIEQNQEEMKSQLHTILEKLDIIEKAVASLKSSYEEESRPSSPILIPDIAQDA  
?FSLFGPLDS?DHKQLTLKQLATSLSNPTLARIAEVLQLAIEKIN?VK?QITDLENQITQ?K?AS  
LASQLTKLSIV?I?SPDSFVQS??IKAMDGESK?TDSSEEPKPSPGESSGTSYQSAWEKWCNAKY  
GGN?K?PMDIDGQPTTSIKHVDNAPISDFDCKSKTEIENI IQRWQSWAKTQKLLHKDKVSWSDIA  
LRITWGFVGNLN?WVERVTPRSKLRILEHEKPVDELVKAVVHEFYGDIKINMSHYADLYMNQRLC  
HLSQLPKYFCTMQTLLYKVPDPNN?AYLRKYLSSMPGKVPDLVRERLEDLEIDISELSLAGLQEQ  
IVTALQKECMRKKTAKSLKKH?GFDSVCEVFTETSSFGC?QK?KSKKWSKNDCGCSDCCKNHKKR  
KFT?KYPRKFSIP?RKVFFKRRP?NARAKPSSCFICKKPGHWASQCPLR?K?KAQTKIMDLFLTG  
YDPAEWDLVSNRSDGEYLSLTEDSDSSLDHDSPP?E\*

>Pglav\_2 (ORF3)

MTISLILIL?LP?LEALNFLDIKMMSSFVDLNSLQSQRSTLQHK?SALTPGQFHLSD?YASQIAP  
LTAQIDAIQQPSVVNIHH?TPTDAEFVRPKPKPITT??TSKGKAIIPYSASIKDDES LDNTIFHL  
EEEIREKEALVQDLWKTLLKQKEELEYLKKKRDEEFEKEIFNKESEAEFFETKIVKGLDDR LVIS  
VNIKVQGYLQYTLDAQLDTGAMNSCAKHGAIPEYYWQPVDISFRAVNKTELKIKHIAPDFP?YIQ  
EEKVPVTLYSFDTGADILL?QDFVNKCLPLTVGNNFVQLTINGKPLKIPSKSTFETRIAVKETTQ  
QVEKSASSLARIQKIIGHANKHGMEI IKEIKEKIESDCTSDYPNAFWTREQYFVSLPYKEDI PR  
PQKASANHMSPTLEYCQKEIAELLERKLIENS RSPWACPAFYVNKHSEQKRGKPRMVINYRALN  
EALLPIRFPLPSKELLFSKIGKCNVFSKFDLKS GFWQI?IIPKDRYKTA FVVP?GQYQWKVMPFG  
LKNAPSEFQKRMDDIFKHL SF?IVYIDLLVCSVDMKTHVQHLKIVYD LLYKHGLVLSKSKLCWA  
QTKIEYLGLILSQGEVELQDHVLKKLSEFPDEILDTKQLQRFLGCLNYIRQFYE?QAKDVRILQK  
RLSKTIPWNYKMTQAVQI IKQKI QNLPKLHLPDMSFQLILETDASNETWA AVLLQKNGPKLEEVC  
IYTSGCFSDAESRYPSSHKEILAVKNGIKKFRMFLKPVHFIVRTDLKHMKGMLTNQRLL EQGNNR  
VLRWSLWLDGDFEIQYKPGKDNCIADLLTREAAPTKEKD KTIKWLHPP\*

>Pglav\_2 (ORF4)

MASSLSIRDAPPPGFKWILVCKDCKYCYCFECLACCIKSSPACIHILEIWIQTYNHFETYGRYF  
RDSRN?FRGIMTGGPFQGVYIILYTPDISYEDYCKIMLQTKYDGSCWITFECS SFKDY YFWSG  
WLYILFWTYCPRDADFFKNTSKEAFKQWFQAEVQEA AHYEAWFVFNLSFMGSELHYEQTEPSQPP  
CYKVTSDYFGDLCPPEDELIPAMQGS PFYRCFSGLP PFSNDHSSPPSSH DYDSDFSFD SVAEYNI  
KNRMEA\*



## The consensus sequence of PtaeV\_1

### #Nucleotide sequence

>PtaeV\_1 (8,058 bps)

TGGTATCAGAGCCGAGTTGTTGTGTTAATGGTATTCTGTTGGTAAGATATTGTTTGAGTGAAAA  
CTATTGGTAACATATCGTCTGAGTGGATCACTAGTTTTCGTTGAGGCCGTGAAWAGTGCGTAATGC  
CCGTGTGGAGCCGCTGAAGGCGTTGAAGGGTAGCATTTCGGCGTAGAGCTAGAATCGAGGAAGCCG  
CGATTTGTTTCGTAGTTAAAAGCCGCAATTTCTTACAGAAAATCAGCAAGCAATACTCGAGTTTGA

### ORF1→

GAAACTATTTTACGGGTATTTCTCTTTATATTCCTTAAATGGATTCTGCAAGTTCTAGTTCCTCT  
TCTTTTATGGGAAGATTTGGTTCTAAACATTTAGAGAAAAATCCAAAATGAAGACGAATTGCATAG  
TGGTTTAAATATTTGTTCTGAAGAAGAAACCCCTGCAAATCTGCTCTCATAGAAAAAGAAGAT  
CAAACCCCTTCTGTCAACTGGAGACTTCCTCCTGTCTCTCCTTCTGAGGTTTACCGCGGATTAACC  
CCTTTTAATCTCCGCGCGTACAGTCAAATAAAGATTAAGAAAAATCCATAAAGACTGAGTTAAA  
TCTCAATACTATGATGACAATCCCCATGTTTGAAATTCGCCATATTCAAGCCGCCGCAAGGCAG  
GTTATCAGTATGCCCATCTCGGGATGGTGAGAGTCCGTTCAATGCACTCCATCGAAAAGGCCAA  
AAAGCCTATGTTTTCTCAGCCCTCTTTGATAATAGATGGTCATCCTTTACACAAGCCTTGATAGG  
TGGGATAGAAACAAGTTTGTCCGATGGCCCTGTACAGTATGATGTTTTTCCAGATTTTTCTGTTG  
CACTTGATGATGTAATATTCTACAGTGTGTGACTCTTGGTATACAGACACAAGGCTATGAGAAT  
TTTAAGTCCAAATCCAAAAATCTAGCCATATTCTATATCACTTGTGTTCCGTTTCTACAATACTAC  
TATTCCTGCAGTTTTGCATACTCCAGACAAAGATGATGGAAAAGTTACTCTTATTCAATACGATT  
CATCCTGTAACCCATTTGCCCCGCTCTGTGTTTCAAGAAAACGTCTGTGTCTCCAGATGATTGG  
GTTACTAACTGGAAAAGCCTGCAAGAAAGACAGTACATGCAGCTCAATCTGTAATAACCGAAAT  
GGATGACAAAGTTGTCACAAGATTTCCAGATCAAATCCTTCTGACACTGTTGTCACTTCTGTAC  
CTACTGTAAATACAAATCCTTCAAATATCATTCTTCTGTACAAAATCCTCAGCAGATCGTCATT  
GACCCCTGCTGTTTTTGAAGCTTTAAAAAATCTGTTTCAGCAATCCTTCTTCTTCTCAGAATGCCTT  
ATCTTCGGTTTGGGATCATCCTCACTGTTCCAAGACATATTGTCAATTTTTCAAATGACCCCTCTA  
ACCCTCATGGAAAGTCATCTCACGACTTTCATATCAATATGATCAAGTTTATAACCAGCTGAAGAC  
TCAGTTTGTCTGATAAGAGTTACACTAAAGTTACATTCTTCAATCCTYATGAAGAAATGTTTGT  
TCAGTCAGTCAGCCAACCTCTACCTCTGGTTTTAGGTTTTGTTTATTCTTTTTCAAATTCAGACT  
ATAGAAGAAATCCTATAGACAAAATTCCAAAGTCTGTAGAGATCCCGTCTGATGAAGAAATCCTC  
TCTTTTCTGAAAATCTTTAAAGGAATTGGCCCTTATGATCCAGCTGATCCTTGGAAAAGAAAAT  
GTTCCATTGGGATATTTTTACTCATGAAAAGAGCATCTCTATATGCAAGAAATGTTGCTCCAAG  
AGAAAAGGATCGCAAGAAATTCATGAGCAAAATAGTGAGTCATGGAAAGCCTGGATGACTATT  
AATAATCAGTGGATATCATTCTATGAATGGTATTATCCTTCAATTAATCAAGTTGAAGATGCCTT  
GATGAAATCCTTCAGAAATCAAGCCAAACAGAAAAGATTGAGAGATCCAGAAAATTTTGTGATG  
AAAAAATGGCTGAAAATGTTGTAATAATTCCTTCTCCTCTAAGGATTCCAGAGTTTGACCCAAA  
GTTTCAGAAAATGATGAGTAAACCAACACCCTAGAAAATTTGGTTTACATCAGACAAAAGGGAGA  
AGAATTAATAAGAGAAGTTTGTCTAATCTTAGAATAAACATGATAAGATCAGGAACCCCTGCAA  
AGCATAAATGGGAACTCCTAGATGGAAATATTTTTGAGACAGACAATGATTTTTCTCCTTGGAAA  
AATATGGTCATTAGAGGACAAGATGGGAACTGTATAAACTTTTGCCTTCCCATCCAGATGATCC  
GAATTCCTCAGCCAAAGAAATGATAGCCGCTACCAATTGGACTAATCTTGCTTTATCCAGCTTAG  
AAAGATTTGCTAGAGCTAAATTTGATAATTTAGAAAAAGCAAAATAGTGAATGAAAGTCTTCTG  
GATAGAATTTTGCAAAAGCAAGATTACAATACTATGTACTTAAATGAGCATGTGAAGACCTTGGC

TGAAAAATGATCAGACTATAGCACAGAGTCTTGATAAGCTGTCTTTAAAAACAGAAAAGCAGATCC  
ATGATGTAGCAATTGCTCATGGACGAGAGATTGTTAGAGTTAATAACAATCTAGATTTGATAAAA  
GGACAAGTAAAACCTGTTTCTTCAGATTTAGCTACTTTAAAGAAAAAGCCAAATACTGAAAGCTA  
TAAATCTGCAACTCTGTTTTTCCAATCCAGTTACCACTGTCCCTTATTCTATTTCTCCTTCTGTGG  
AAAGTTTAAATCAAACCTCCAAGTATCATAAACTTTCTCCTCCCCTTCTTCTCATCCATACTCT  
TTATTTGCTAATCCAAGTTTCTTTACACCACTTCCAAAGTCGGTCCCTAAAGTCACTCTTGGTTC  
AAAGAAAAGAAGAAGAATCTAAAGAATTCAAAGGGAGTTTTTCAGAGTTCTTTGCTTCATCTA  
GTCATGATGAAGAAGAAGAAAAATCAGATGCAGCAATTACCAGTGTCAATAAAAATAGATGATACA  
CCTAAACTTGAAGAGCTAGAAAGCTGCATAAATAATTTCTCTCAGCAGGATAAAGAAAAAATTTGG  
TATTTTCAGAATTGAATCCTTCTGAAGAAATAGCGACTTCTGAAATTGACCAGCAAGTCCATGCTA  
CTACCTCTAGATCTACCTGGACTTCTACTTGGAAACCCTGCTCCTGACCGTCGTGATTTAATGAAA  
TCAGAATATCATAAGGATTGGTCAGCAAGTTCCACTTATTCATGGAACATTGACAACCTGTACCGA  
AGCCGAAGTAATGTCTGTCTTACATTTCTATGCTTGTATGTTATCGCACTTACCTTGCTGATGACA  
TTGGTCCAATAAATGCTACAAGAAGAATAATAGCTGGCTTCGAAGGTACATTAGACTCTTGGCTT  
AAAGCTGAGACATTGAAATTGCCTACTCTGCTTTTACAGTGGGAACAATCAGTCATTCTAAATGC  
AGATGGCACTACATACATGGACCCAGTCACTACTCTCCCTGTAAATAATATGATAGGTTGTTTGA  
TTTATAGAAGCAAATATTTTGTCTCCATTGCAATGAAAAAGGACATATTGCTCCAAATTGTCCAA

→ORF2

←ORF1

AACTGAAAAAAGACAAACAACAATCTGGGAAGAAGAAACAATTTAGCTATAAGAATAAAATCTGGC  
AAGGTAAATATTATTGATCTCCCTTCTAGCTGTGAAGAATTAACAGATTCAGAAAAATTATTATGA  
TCTAAATGACCAGATACATGTTGTTTATGAAGAAGAAGATTCTGAAGTTGAATATTGCAAAGATC  
CACACTGTAATGAATGTTTTCAAGAACTCTGTGAATGCAGTGATCCTGACATTTGCAAATGTAAT  
GCAGTCAGGATGTTGAGCCACTATCAAATGAAAGCTTAGATCATGATGAGCTTTCTAGAAATTA  
TTTTACACAAATGGTTAATGCTGATGATCCAAAACCTCAAAGAAATGTATAAAGGATTGCTGATGA  
CCCATCTTCAACAGTCCAAGTCACAGCAATATCAAGAACAACAAAAGTCACAGATAAAATCATCAA  
CATAGCTATATTCTTCTGCAGCCTTATTTTTAGTTGATGGTCTAACAAGACAATTCAGACAACA  
AACAAATGAAGATGATCTTCCCTCAAACCTTCTGCAATTAGTCAAGCTATCAAAGATCTCAGAA  
AAGAAGTCAGAGAGAATAGAAGGCTATGCATTGAAGCACATCAGGGGCACAATATACATTTCTTA  
CATGCACAACCCACAAAAGGAGAATCTTACAGACAGAACAGAAAGAACCAGAAAGACAGCCTGA  
TCCATATCATGATCCAATGAAAGGGATTTTTCAAATCTGAAGACTTTGAAATTCAGATGAAGAAT  
TTGAAGATCCTAGATCTGGATTAGGAATGAATGCAATGAACGCAGATGTAATGTACTGTGTA  
ATGAAAAATCAGAATTGGTTCTTCCATAGAATGGTGGAAAGGTTCTAATTGATACAGGTTCAAGATT  
GAACATAGTAAGCGGCACTGTAATCCCTATCTCAAAGACAAAAGACAAAAGTGTCCAGGAGTTG  
TTACTGCAAGTGGAGAAATCAAGACAACGGAAGAAGCTATAATAGATGTCTTCGTTTCTCAATCT  
GAAGGAATTCAAGTTCATGCTCCATTAGTCACAGGGCTTGATTGTGCTATGTACTTAGGAACTCC  
TTTCTGAGCAATTTTCAAGACATGGAAGCACTTATGATGAAAAATCACAGAAATGGGGATATT  
TTCTTCTCTCAAAGGTATAGATTATTTCTATCCTTTTATTTCATTCCAATTCTCCTAATAGATTG  
AGCAGAAATGACAGGTTACAGAATACCTTGGCAAAGATGGAGAAGAAGAAAGAAATGCTCAAGAT  
TGATGAAAAATCTTCTGAAAGGCAAAATTTGAAAAAGAAATAAGTGAGATCTCTCAGAAACTAAAAT  
CTTGTTGTTCTGAAGATCCAAATGCCTTTTGGCATATTCATAAACATGAAGTAGAATTGCCTTTG  
AAAAAGGAATTTTCAATGGAAAACCTCAGAAGATCAAAGCAATACCGATGAATTCTGAACAACCTCAG  
GTATTGTAAAGAAGAAATAAAAATCCTTACTGCAAAAAGGTTTGATCAGAAAGTCTCATAGCCCTA  
TTGCTTGTTTTGGATTTTATGTCAACAAACATTCAGAGATTATCAGAGGAAAACCAAGATTGGTA

GTAAACTACAAGCCTCTGAATAATATTCTTGATTATGATGCTTATCCCTTGCCAAAGCCCTCAGT  
GCTTTTGTCTCAGATATCACAGTCAAAAATCTTTTCCAAGTTTGATTTAAAGTCTGGTTTCTGGC  
AAGTAGGGATAAAAGAAGAAGATAAGTGGAAAACAACTTTTTCAGTACCAGAAGGACATTTTGAA  
TGGAATATTATGCCCTTTGGACTAGTAAATGCTCCATCCGCCTTCCAGAGGATTATGGATGAAAC  
TTTTGAAGGTATGGATGATTTCTTGAAGAAATATATTGATGATGTTCTAATTCATTCTGCAGATA  
TTCCCTCTCATATAAAGCATCTTAATATATTCTACAAGAGAGTCAAAGAAAAAGGTATAGTTTTA  
TCAGATTCAAAAATGAAGTTATTTTCAGACTATGATAGATTTCTTGGGATATGTGATTCAATATGG  
ATCATATTACATTATGCAACATAGTCTTGATTTTCATAGATAAATTTCCAGACAGAATCACTGATA  
AAACTCAACTACAAAGATTCTTGGGTAGTTTGAATTACATCTCCAAATTTGTCAGACATTGTGCC  
CAAGACAGAGTCTTATTGAATAAAAAGATTGCAAAAAGATCCAATTCCATGGACAGAGGATTTAAC  
AGAGGCAGTCAGAAGAATTAAGGAAAAATTAGGAATATTTCTCCTTTAAGCACAAATCAATGAAG  
AATGGCCTAAAACCATCATTACAGATGCCAGTGATATCGGATGGGGTGCAATTTTCTGCCAACAT  
GATCCTAATAAAAAGAAAATGGAATATGAAATTTGCCAGTATGCCTCTGGAATCTGGTCAACTAC  
ACAAAAAAATTTGGTCCAGCCTAAAGAAAGAACCTTAGAGTTGTCTGCCTTGGCATTGCCAAATTC  
AAGATTTTGTGATCTATAAACATTTTACAGTCAAAACAGATTGCCAAGCCCTTAAGTTTGCTATC  
CATAAATGTGACTTTGAAGATGCAGCAATGGTTAGATGGATAATGACATTGGCCCAGTATCGTTT  
TGATGTAGAGTTCATTTCTGGAGTTAAGAATTCCTTCGCAGATCTTCTCAGCCGGGAATTTTAC  
AGAGAAAATGATGTAAATAATCTCAGATGTAACGTCATAAGAAGATTAGAAAATGAGATTCACATT  
GAATGTGCTGATGGTTCTCACACTTTGAATCTGCAGAAACCTCTACTCGATTATCAAGCAGATTG  
GTTTCCAATGAAAGAAATCAAATATCGGCATGGAACCTGGACAACATTATTTCTCATGGGATGATC  
AAATGCAAAGAAATGATGAAGCTTTTGAAGCTTTAAGCTTTCTTCAAGATTTGAGAAAATCTTGAT  
TTCACATTACACAGAGATGCAGATGAAAATCTAATCTGCTGTGAAATCTACATTGATCGCTTCCT  
ATTGCCACCCAACCTTCAGAACTCTGAAGATCATGAACGCCAAGAGAAAAGCCTGGTATACAGGTA  
TGTGTTTTGAAAATAAAACTAACTCGTTTTTCTATAATGTGCAGTTTTCTTTTAGATATCATGGG  
ATGCAAGTTACACAAATCGAAGAACAAGACCCACACCTGAATGGTTTAAAGAATGGTGGAAACAT  
TTATGGTATCAGTCCTCTATGTTTTTACCCATTCTCTCTCTGGTTATTACAACCTCCTGGATTTA  
CAGAACCACGGGCACATCAATCAGGAATTTTATACAAAAGGATTTTGGATATCAGCAATATCACC  
AATTATCACATGCTTGACGACTCCGCGCCAATGGATCCTTTCATTGGTTTATTACACGAAATAT  
TTTCTTCAGAAGATTCGGGGGAAATATGAATGGCTCTTCACATGACTATGAGTCATTTTCATGCCA  
TGACAGATCCAGATTTAAATCCTTTTGGCCACTACTTTTTTCAGGACGAAGTACCAGAATATGCT  
GAAGTACCAATTTGGGAATGTGAGGAAGAAATTTACTCACAGTATTTTAATAATGACTCCTTGAC

←ORF2

TAGGTTCAGAGAACATCATTATTTCTCGTGAACAAC TAGAACATTTTGTCAATTTTGTAATGTCTTT  
CTGTCCGACTTTGGTGGCAGACAGGTTTTTTCGTAAGGTTCCCTGAAAAGAATCTCTTACAGTGT  
AATCAATCCGACATATATAATTAATAAAGGGATAAGAATAAATATAAAATATTTTTATGATTGAA  
T TACTGTGCGGATGTCCTCCGGGT TACCCGAAAGCAGGAT TCTCTCATATCTGATGTAAGGATTT  
GATTTT GATGTAAAGTAAGATACTGTGCGGATGTCCTCCGGGT TACCCGAAAGCAGGAT TCTCTC  
ATATCTGATGTAAGGATTTGATTTT GATGTAAAGTAAGAT TCTCTCATATCCGATATGGAGGTAT  
CACC AAACCTAGAACTGGGAGGATCTATAAATAGATGAAGACTAGGGAAGAGAGGCATTCGGGTT  
TTGAGAAAATTTAGAGAGCCTTTCTGCTGGAGAAGTAACCTTAGTATTGCTTGAGAAGCAACTTTGT  
AATACTTGAGTTTTGAAGTTCATCAATAAAGATTCTCAATTTCTGTAAATCTATGTCTCCTTTG  
TAGATTGTTTTGGATTCTATTCTCGAACCTGTATGAGCCTTGTTAAGGTTGAAGAAGTCGCAAAG  
ACGCAGAAGTAGACCGTTGGGCCAGAGTTCGTGTTTTCCGCACGAGGATATTGTTTCAGAAGAATTG  
TCAGATATTGGAGCGATTAAGCAGACCTGGTATTTATTATGAACTAATACTCTTGTGGCATT

## #Protein sequences

>PtaeV\_1 (ORF1)

MDSASSSSSSFMGRFGSKHLEKIQNEDELHSGLNICSEEETPANSALIEKEESNPSVNWRLPPVS  
PSEVYRGLTPFNLRAYSQIKIKEKSIKTELNLNTMMTIPMFEIRHIQAARKAGYQYAHLMVRVG  
LNALHRKGQKAYVFSALFDNRWSSFTQALIGGIETSLSDGPVQYDVFPDFSVVALDDVNILQCLTL  
GIQTQGYENFKSKSKNLAIFYITCVRFYNTTIPAVLHTPDKDDGKVTLIQYDSSCNPFAPVSVSR  
KRLCPPDDWVTNWKKPKARKTVHAAQSVITEMDDKVTRFPRSNPSDTVVTSTVPTVNTNPSNIISS  
VQNPPQIVIDPAVFEALKNLFSNPSSSQNALSSVCDHPHC SKTYCQFSNDPPNPHGKSSSHDFHIN  
MIKFIPAEDSVCSDKSYTKVTFNFP?EEMFVQSVSPTSTSTGLGFVHSFQIPDYRRNPIDKIPKSV  
EIPSEDEILSFLKIFKIGIPYDPADPWKKMFHWDIFTHEKEHLYMQEMLLQEKKDRKKFNEQNS  
ESWKAWMTINNQWISFYEWYYP SINQVEDALMKSFRNQAKQKRLRDPENFVDEKMAENVV IIPSP  
LRIPEFDPKVQKMMSKPNTPRNLVYIRQKGEELIREVCSNLRINMIRSGTPAKHKWELLDGNIFE  
TDNDFPPWKNMVIRGQDGKLYKLLP SHPDDPNSSAKEMIAATNWTNLALSSLERFARAKFDNLEK  
ANSEMKVLLDRILQKQDYNTMYLNEHVKT LAENDQTIAQSLDKLSLKTEKQIHDVAIAHGREIVR  
VNNNLDLIKGVKTVSSDLATLKKKPNTE SYKSATLFSNPVTTVPYISPSVESLIKTPSIINFP  
PPTSSHPYSLFANPSFFTPLPKSVPKVTLGSKKEEEESKEFKGSFSEFFASSSHDEEEESDAAI  
TSVNKIDDTPKLEELESCINNFSSQQDKEKFGISELNPSEEIATSEIDQQVHATTSRSTWTSTWNP  
APDRRDLMKSEYHKDWSASSTYSWNIDNCTEAEVMSVLHSM LVCYR TYLADDIGPINATRRIIAG  
FEGTLD SWLKAETLKLPTLLSQWEQSVILNADGTTYMDPVTTLPVNNMIGCLIYRSKYFASIAMK  
KDILLQIVQN\*

>PtaeV\_1 (ORF2)

LKKDKQQSGKKKQFSYKNKSGKVNIIDLPSSCEELT DSENYDLNDQIHVVYEEEDSEVEYCKDP  
HCNECFQELCECSDPDICKCNAVRMFRPLSNESLDHDELSRNYFTQMVNADDPK LKEMYKGLLMT  
HLQQSKSQYQEQQKSQINHQHSYIPSAALFSVDGLTRQFRQQTIEDDLPQTLPAISQAIKDLRK  
EVRENRRLCIEAHQGHNIHSLHAQPTKGESSQTEQKEPERQPDYHDPMKGIFKSEDFEIPDEEF  
EDPRSGLGMNAMNADVMYCVKMKIRIGSSIEWWKVLIDTGSRLNIVSGTVIPYPQRQKTKCPGVV  
TASGEIKTTEEAIIDVFVSQSEGIQVHAPLVTGLDCAMYLGTPFLSNFRRHGSTYDEKSQKWGYF  
LLFKGIDYFYPFIHNSPNRLSRIDRLQNTLAKMEKKKEMLKIDENLLKKGFEKEISEISQKLKS  
CCSEDPNAFWHIHKHEVELPLKKEFHGKLRRSKAI PMNSEQLRYCKEEIKSLLQKGLIRKSHSPI  
ACFGFYV NKHSEIIRGKPRLLVVNYKPLNNILDYDAYPLPKPSVLLSQISQSKIFSKFDLKS GFQ  
VGIKEEDKWKTTFSVPEGHFEWNIMPFGLVNAPS AFQRIMDET FEGMDDFLKKYIDDVLIHSADI  
PSHIKHLNIFYKRVKEKGI VLSDSKMKLFQTMIDFLGYVIQYGSYYIMQHS LDFIDKFPDRITDK  
TQLQRFLGSLNYISKFVRHCAQDRVLLNKRLQKDPIPWTE DLTEAVRRIK GKIRNISPLSTINEE  
WPKTII TDASDIGWGAIFCQHDPNKKKMEYEICQYASGIWSTTQKNWSSLK KELRVVCLGIAKFK  
DFVIYKHFTVKTDCQALKFAIHKCDFEDAAMVRWIMTLAQYRFDVEFISGVKNSFADLLSREFLQ  
RNDVNNLR CNVIRRENEIHIECADGSHTLNLQKPLLDYQADWFPMKEIKYRHGTGQH YFSWDDQ  
MQRNDEAFEALSFLQDLRNLDFTLHRDADENLICCEIYIDRFLLPPNLQNSE DHERQEKA WYTG  
CFENKTN SFFYNVQFSFRYHGMQVTQIEEQDPTPEWFK EWN IYGISPLCFY PPSLWLLQLPGFT  
EPRAHQSGILYKRILDISNITNYHMLAALRANGSFHWFITRNIFRRF GGNMNGSSHDY ESFHAM  
TDPDLNPFGLLFQDEVPEYAEVPIWECEEEIYSQYFNND SLTRFREHHYSREQL EHFVIL\*

## The consensus sequence of PtaeV\_2

### #Nucleotide sequence

>PtaeV\_2 (4,893 bps)

#### ORF1→

```
TGGTATCAGAGCCCTGCAACGTTCCCTAATGGGCTAGTTTAATCAGATCCTTTTCAACTCTGGAAAG
ACGTGTTGTTACTGAAGTAGATTCTAGATCTTTTGAAAAGGAAATCGAGTCTGAAAAGGAATTAG
AGATAGTAGAAAATCCTGAAAGTTGGAATCCTCCAACCTTCATGCAACTGATGTTTATAAAACT
CCTCTCTCTAATATCTTTTCAGAAGAAAATGCTTTTAAAGGAAGTGAAGTTAAAATCAAAATCTC
AGGTCCCTTCTGTACAGATTGTGTCTCTCTCTTTGTTTACCCTGAAGAAATCAAAAAATTTTCGCC
AATATGCAAAAGACAAAAAATATTCCATTTTACATTTTGGAGGTATAAGAATAGGTTTGGCCCCCT
TTGTTTAGACATGGCTTAAATACTCCGTGCATGTCTGAAGTTTTTGTACTCGACACCAGAACTA
TGATCATGCTAGAATAGGTACCATTGTTGGTAACCTATCTACTGGTTGTCAATATGGAACGATTT
TTCTGATTACTCTATTAGTCTTACGGATCCTCATCTGAAGGATTGTTGGAACTTATGGTAGGA
GTTCAAGGATTACAGATGGTTGATGAAAGTGAATATTTATCTGTAATAATTCATACATCCTTCCA
GTTGACTAATACAGTCCATCCGAAATTTAAACAGCCAGTGCTCAGAGATTGTGTGTGTCAGTTGGTT
TAAACAATGCACAAGTAGAGGGAGTGTCTTATGATTCTATAGGTTTACCAAACGACTGGTATTTT
CAATACAAGTCTTTAGCTGATGAAAAGAAACCAGGAAGCCTGACAAGAAGAGCTTCATTGCAAGA
AGGTAAAAATAAGAATACTTCAAGAAAAGCCTTCCATCCCGGACCCATCATTTCATCCGAGAAAAT
ATGCATTACCAGTCTCAGAATCTACAGAATCCTCTGCCCAAACAGCCAGCACTTCTAGTCAACCT
ATGTTATCTTCAAATGAATTGTATATACCTGAAGTTAAGCCTTTTCTTGCTGTAAATAAGATGTT
TAGAATTTCTAATTTCCAGATAGCCCCAGTTGAAGAATGGCAATATGCTAATCGTCGCTTTGTAA
AAGGAGGCAAATGGCCACCAAAGACGAAATTTCTGTACTACTTCGTCTCCTCAAAGCAACCTCCT
ACAAGAGCTGATTGTGCCCTTTAGTTGAACACAACCTCCTCAAATCCAAATGATTTAGACCAGTT
GTATCAAATTTGGTAATTATATTACCACATGGTGTCTTATGCTGAAAATGCTATAGATGATCTGG
GTGCACAAAATGAGCTCATCCTAGCCAATCTCAAGCTCTTACATGATGAACAACAAGAAGAAAGA
GCCGAGAAAGAGGCAAGGATGCAGAAAAGGAAAGAAGAAGAAAATCTAAAGCAGCTCAAAGCTC
AAAATTTTCTATAGATATGTGACCCCAAATTTTTGGGATTTAGAAGAAACAGAAGCTAGCACCT
CTGAAACACCTTTCAGACCAATGAAAATAGAGTCTATTCCAGAGMAGCCAAGAAAAACAAAAGCA
GAAATAGTGACTCTTGAAAATGCAGCTTCTAAGTTTCCATCTTTTATCATGCCATCAATCCAAA
AGCAAAATTTTGTTAAAGAAGTCCAAAATATCCTAGAATAGAAGAAGATCTGTTTGCTTCTAATT
CTAGCGGTTATATTTTGGATTTGGATAAATCAACAAATCCAGCTGAATCAATTCGAATATGGATC
GGAGCATTATACCAAATGCAAGTAAC TACAAAGCTCGATAATATGTCCATATTTGTTCTAGCAGA
GAAAAGAATGGCCGGAATAGTTTATGACTGGTGGATTGGACCTCCTGAGTCAGAACGACAAGCAG
TCATTGCAGCAGGACTTTCTACTCTAGAGGTACTACTGAAAACACAGTTTGTCCCCGAGCCAATA
GATGAGAAGAAGCAAATCATTACAGACCTTGCTAGAATGGAAC TGAAGATTTAAAATATCTTGA
AGCTTTTGGTCAAGATTTTATGGCCAAAGTTTACAAAGCAAATCTTTCAAATGATTCAGTTCAGA
AAATTTCTTTTCTGTCAAAAT TACCAGGAAATCTAGGAGATCTGATTTCTAAAGATATTGAGCTT
CAAAGCAAAACAATAGATCAGATTTACTGGATAGATCTTTTATTCAGGTGTCAAGAGAAAAGTCAA
ATATCTCTGTTGGCAAAAACAAGCACATGATATAACTCCCAGTGCCAATGTTTGTGCTGCTGCTT
TGCCATGGACACCATTTAAGAAAAGGAGAAAACATAAAAGGTATGGGAAATTC AAGACCAAGAAA
ATTGCAAATCCCAAACGACCTTTTAAAATTTT CAGATTTCTAAAGAAGAGGAAACAACCGAGAAC
CAAAAACAATTGTTGTTTTCATATGCAAACAGGAAGGACACTATGCTCGTGCTTGTCCAAAAGCA
CATCCGGTAAATTGAAAGCATGTGTAGATATTGAAGAATTTTGTGATGATTGGTCTGTTGTACAA
```

TCAGAAGAAGAACCATCAGATGTATATATGTTAACTGATGCTTCTTTTTTCAGAAGATGAAGAGTT  
AATCAATTCTGTTTCAGAAAATGAATATTTGTTATGATTGTTCTACTGATGAATTTTCAGTTGAAG  
ATGAAGAAGAAGAACTTCATTACAGTGAAGAATTTGAGACTGACACAGACAGTGTGAAAACAGT  
GAAACAGAATCTTTATGTTGGTCTCTCCCACCAGAGAAAAGACAAAGGAAAACAGGTTATCCCTAT  
TCTCCCTCAGTTAAACTCTTTTTGTCCATATCAGAAAAATATTGGACAAACATCTTCAATGCCAG  
TTCTGAAATTCGACCCACCAGCAGAACAAACTTTTTTGAAGAAAATGTTAAAAACAAAATAATCTT  
TTGTATATACCAGTCTCCGTGCAGGTTAAAAATAGTTGGATAGATCTTGATGCATTTATTGATAC  
CGGTGGCTCAAACAATCTTGCCAGACCATCGTTGTTTAAAGGATTATGGAAACCTCTCCAAAATA  
TCCTGATTTTCAGAAACAATCGGAGGTACAGTTAATCTTACTCACTATGTGGATAATATTTCTTTA  
AAAATAAGTGGGAAGATTGTCAAGATATCTGCTATACAGCATTACGACCCATCTGCCAGTTTAAAT  
TCTGGGTATGCCATTTATCAATTCTGTTTTGCCCGTACTATTAGCGAAGATAAAGTTATCTTCA  
ATTTCAAAAAACAAGCAATCTCTGTTCCGAGATTAATAATTTGCAGACTCTGAAGTAAGAAGAGAA  
AGCCAGAAGAAGACCAGCACAAGAAAAGCCAAAAAATGATTCCAAAGATTGGCAGAAAAGTACTGCA  
GATTTATGAAGAAAAGGAAGCTCTCAAACAAAACAAAAGCAGCAATAGATCCGCAATGGACTC  
AGGAACAAATCTCTATATATCAGCGGTTAGTTAAAAGCTGCTCAGAAGACCCTCAGAAGTTTTGG  
GAAAAGGAGAGCCCCAAGCAAGAAATTTGTGACCATGCATGATAATGGAGTAAAAGGTAAGTTAAT  
TCCTTGTACTCCTTCTGATGAACAAGAAATCAAAAAACAGATTGAAGAATTGTTGAAGTTGAGAT  
TGATTGAACCGAGTGTTCCTTCCATTATTCATGTTCTGCATTTTTGGTTCGCAATCATTCGAAATA  
GTTTCGAGGTAAAGCAAGAATGGTGATTAATTACAAACCATTGAATGCAATCACTCAAAGCTTTCA  
TTATCCTTTACCTCGTCAAGAAGTAATAATGCAGAAAATTCAGAAGAGTAAAATCTTCAGTAAAT  
TTGATATGAAATCTGGTTATTACCAGATTCAGATTGAAGAAGCAGACAGACATAAGACAACATTC  
ACATGCCCTGCAGGATTTTTTCCAATGGAGAGTTGTTCCATTTGGATTAAAGAATGCTCCTGCTTT  
CTTCCAGAAAAGAATGGATTTTTATATTTGGTAAGTATGATTTTATCATAACTTACATTGATGATA  
TTTTAATCCATAGTCCAGATTTACAAACACATTTGGCTCATCTAGAAATATTTTTTTCAAGAAGTT  
CAAGCTCATGGTATTGTCCTCTCAGAAAAGAAAATGGTGTATTCCAAAATGATATTGATTTCTT  
TGGAATTCATGTAATCGATGGACATATACAGATGCAACCGCATGTGCTAACAAAGCTTGCTGAGT  
TCCCTGATGAACTCAAAGATAACAAAATGATTCAGAGATTTTTGGGTGTTTTAAATTTATATCCAT  
AAATACATTCCCAGGCTATCTGAAAAAAGTCTCCTATTCGAAAGCATTAAAAATCAGGTTGGTC  
TAGTCAAGCCACTGCCGCTGTCAAAAATCTCAAAGAAGAATGTAAGTCCCTGCCAAAATTCGAGC  
CTCCAGGAGAAGGATTGTTAATTTTTACAAACAGATGCCTCAGATGATTTTTGGGCAGCTGTTCTT  
TTTTGAAAAGAAAGGAGGAAAACAAAGAAGAAGAATTATGCGCCTATGCATCAGGAGAATTCCTCCC  
CAATCAGAAAATTTATTTTGTGCTGCTGAAAAGAAACTCTTGCAATATTTAATGGCATTCAAAAAT  
TTGAATTGTATCTTGCGCCAAGAAAATTTCTTGATTAGGACTGACTCAATGAATTTTTAAATATTTT  
TTGTGACAAAATTTATCAAGACAGATGGCAAGAGGAAGATTATTATCATGGCAAATTTGGTTCCA  
GCAATATGATTTTGATGTAGAATGGATTCTGGAAATTTCTAACTATATTGCCGATGCTCTTACCA  
GGGAAATGAATAAAGCTCATAGAATTGGCCGCAGCCGGACAGAAGTCAGAGGAAGTATTTTTGAT

←ORF1

ATTCCAGATCAGCCAGAT

### #Protein sequences

>PtaeV\_2 (ORF1)

MASLIRSFSTLERRVVTEVDSRSFEKEIESEKELEIVENPESWNPPTLHATDVYKTPLSNIFQKK  
MLLKEVEVKIKISGPSVQIVLSLFTTEEIKKFRQYAKDKKYSYLFHGGIRIGLAPLFRHGLNTP

CMSEVFDTRHQNYDHARIGTIVGNLSTGCQYGTIFPDYSISLTDPHLKDCWKLMLVGVQGLQMVDE  
SEYLSV I IHTSFQLTNTVHPKPKQPVL RDCVSVGLNNAQVEGVS YDSIGLPNDWYFQYKSLADEK  
KPGSLTRRASLQEGKIRILQEKPSIPRPIIHPRKYALPVSESTESSAQTASTSSQPMLSSNELYI  
PEVKPFLAVNKMFRISNSQIAPVEEWQYANRRFVKGGKWPPKTKFCTTSSSSKQPPTRADCAPLV  
EHNSSNPNDLDQLYQIGNYITTWCSYAENAIDDLGAQNELILANLKLHDEQQEERAEKEARMQK  
KERRRKSAAQSSKFSIDMSTPNFWDLEETEASTSETPFRPMKIESIPE?PRKTKAEIVTLENAA  
SKFPSFIMPSIQKANFVKEVQKYPRIEEDLFASNSSGYILDLDKSTNPAESIRIWI GALYQMQVT  
TKLDNMSIFVLAEKRMAGIVYDWWIGPPESERQAVIAAGLSTLEVLLKTQFVPEPIDKQIITD  
LARMELKDLKYLEAFGQDFMAKVYKANLSNDSVQKISFLSKLPGNLGD LISKDIELQSKTIDQIY  
WIDLLFRQCQEKVKYLCWQKQAHDITPSANVCRAALPWT PFKRRKHKRYGKFKTKKIANPKRPFK  
NFRFLKRRKQPRTKNNCCFICKQEGHYARACPKSTSGKLKACVDIEEFCD DWSV VQSEEEPSDVY  
MLTDASFSEDEELINSVQKMNICYDCSTDEFSVEDEEEELHYSEEFETDTDSVENSETESLCWSL  
PPEKDKGKQVIPILPQLNSFCPYQKNIGQTSSMPVPEFDP PAEQTFLKKMLKTNNLLYIPVSVQV  
KNSWIDLDAFIDTGGSNLARP SLFKGLWKPLQNILISETIGGTVNLTHYVDNISLKISGKIVKI  
SAIQHYDPSASLILGMPFINSVLPVTISEDKVIFNFKKQAISVPR LKFADSEVRRESQKKTSTRK  
PKNDSKDWQKVLQIYEEKEALKTKQKAAIDPQWTQEQIS IYQRLVKSCSEDPQKFWEKESPKQEI  
VTMHDNGVKGLIPCTPSDEQEIKKQIEELLKLRLIEPSVSHYSCSAFLVRNHSEIVRGKARMVI  
NYKPLNAITQSFHYPLPRQEVIMQKIQKSKIFSKFDMKSGYYQIQIEEADRHKTTFTCPAGFFQW  
RVVPPGLKNAPAFFQKRMDFI FGKYDFIITYIDDILIHSPDLQTHLAHLEIFFQEVQAHGIVLSE  
KKMVL FQNDIDFLGIHVIDGHIQMOPHVLTKLAEFPDELKDTKMIQRFLGVLNYIHKYIPRLSEK  
TAPIRKHLKSGWSSQATAAVKNLKEECKSLPKLQPPGEGLLILQTDASDDFWAAVLFERKEENKE  
EELCAYASGEFLPNQKNYFAAEKETLAI FNGIQKFELYLAPRKFLIRTDSMNFKYFLSAKLSRQM  
ARGRLLSWQIWFQYDFDVEWIPGNSNYIADALTREMNAHRIGRSRTEVRGSI FDI PDQPD

## The consensus sequence of GbilV

### #Nucleotide sequence

>GbilV (6,081 bps)

TGGTATCAGAGCCAGCSAGTCATAAAATTGTTAATGTCTTTGGAGTTAATTTTCTTAATTATTTCT  
GTGATCTTCTATCTTGTTC AATTTATCTTTATTCTGCTCAGAGTTTTACAAAACCTATGACTAGA  
GTTAGATAGACACCTCTGATTCAAGTGAGAAAGCTATCCCTGGTTGTGTGTTTGAAAATCTTGTG  
TTCTCTTGTCTGTATATTCTGGATTGCTGAGTAAGGCCCTGGAGCGAAGGACGTAAGGCTGTGG  
GGAAGTGCCCGTGAAGGTCCGAATAGTTCGGGTAAATCTCAGAATCAGTCAAACAGAAGGAGATCA

**ORF1** →

TTAAGATGAGAAATACCTCTGGAATTCGTGAAGTAAATACTTTCAGTTTTGACATTGAACAAGCT  
GGACCATCTGGAAGTAAGATTGGAATCCTCCAAAGCTACATTCTTCTGATGTATATAAAGTAAA  
TCCATTTAATCTTTTGGCTAAGTTGAATATTAAGAAGCATGAAGTAACGGGGCAAGTACAGGCTA  
AGTCAGGTATGCAGATTGCTCATTGCCTGTTCTTTCTGAAAAAGAAATAGAAGTTTTACAGAAA  
CAAAATAAATATAAGTATATACATTTTGGACAGTTTAGGATTATTGTAAAAGCTTTGTTTCGAAG  
AGGTATAGATACACCTATAATGGTAGCACTGTTGGATTCTCGTTGGAGAAAATGGAAACAAGCCA  
AGATTGGATCTTTTAGAGGAAAATTTGTGTAATGGAGTACAATGGGGGATATATGTCTAATTTT  
CCTCTAGAGATAAAAGACACTCATTTCCTACTGCCATAAATATATTAGTTATGGTTGATGGTAT  
AGATATGTTAGAAGGGTCAAGTTTTATTTCAATAAATGTTACCTCTGTCACYCAGCTCACCAACA  
CTATGACACCCCTTGTATATAATCCTGAAATCAAAGATGTGGTTGCAGTAGGACAAAACAAATGCA  
GAACAGATTGTGGCAGCCCTGAATAAATCCTTTGGATCTTTAGATAATTGGTCTTTCAATTATCA  
AGAAATATTTTATGAGAAACAACCTTCTTCTTCTGTCAGAATTCAACAAGAAGATGAAGAAGATG  
AGCAAGGAAATATTTCTTTAAAAATGGATGAAACCTCCAAGAATAAATAGAAGTTATTTCTTTAAAT  
TTGGCTACAAGTGACAAAGGAATTGAATTTAGAGGAATAACAGAATCTGGAGAAGCTTCTACTTC  
TGGTAAAGAAGTAGCAGAAAAGAAATCCAAGGATAAGTCAAACCTGTAAATAAAAAATATTCATTCTG  
ATTTTTGTTAATGTCTTATGTAAGAGTTCCTATGGAAGAAGAAGAACCATCCAGAATAGATAGG  
GGAGGAAGATGGCCAGTTTTCAGAAGTTTTTCTGCTTTTTCTCCTGATCAAAATAGAAGAGTTGA  
TCATACTCCATTAGTTGTAAGAGATGCCAGACACACTGAAACAACAAAAAMTTTCAAGTACAACAAA  
GAAATTGGATGTGCCAGTGGATGAACGTGCACAACAGAAATATGGAAGAACAGACTGCTAAGTTA  
GATGCATTAGCAGCCCAAATGGAGTTAGTTTTCAAAAAGATTAGCAGAACAAAAGAAAACCTGGTGC  
TCAGAATTATGCTGCAGCAGCTCAAAATTTTAGAACTCAAAGTGAAGAAATACATGATATAGAAA  
GAAGACGCCAAAACAATTAGTTCTAAAAAAACCAAAAAAGGACACTAAAGAAAAGGAAATTTAA

**ORF2** →

ATTAGTAAAATTCAGAATTTCTTTTAGAGAAAAAAGCAACCTGCCTACTTTTCCCAAACAAG

← **ORF1**

AACCTATAAATTTGAAAAAGGAGAACTTCTCATCCTGTTGATATCCCTGCCTTCCAAGTAAAT  
ACACCATTAGGAGTTTATTTGACTTTAGATTGTCTTAAAGATGCTATTGAAGAAATCAGGTTATG  
GATTAGTCAACTACATAATATGCAGTATCTGAAAGGACTTGGAAATGTAGAAATGGTGTATATG  
CTATAAATCTTATGGGAGGAACTGCTAGAAGATGGTGGGACGCAGGTACTGATGAAGCTCAAGAA  
ACCATTAAGCAAGGAGGATTGACTGCTTTATATAAKGCATTGCTTAATGAATTTGCTCATAGTGT  
TCTTGAGGAATATAAAAAATGCTGCTAAATACCTCATGGAGCTGGAACATAAATGATTTTAGAAAAT  
ATGATGAATATGTTTGTAAATTTAGAGAATTATTGTATAAAGCAAGATTACATACTGACCCAGGA  
GCCAAGTTACATTTTGTACAGTCCCTTAAAGGTCTTGGTCCCTCATTTATTAACAAAATTAGAAA  
TCAAGGTATTAATGTCAGAACTATTCCTTTAATGAATTAGCTTTTAGATGTCAGCAACAAATG



AGCTTATGTGTCTTGACAAGAAAGCCCAGAAAGTTCTTAGAAAAACAAGGTTTTAAATATTCTTGT  
TGTAATCATTTCCTGACATTCCTGAGTTTGGTCGAAAAAATTTGTATAGTCATTCCAAGAAGAA  
GAAAAAGTCTGTATATAAGCCATACAAGAGTCGTTGGTCTTTGAAAAAAGTCCCTTGGCAAAAAG  
GCCAAAAAGCCCCAGCTAGAACATTTCTCCGCCGAAGAAAGACCAGAAGACCAATTTCAAAGAAA  
TCCTGTTGTTTTGCCTGTCAGCAGGAAGGCCATTGGGCAAAAAGATTGCCCTAATTTCTTCTAAAA  
ACATCGCACATTTCTTTCTACAGAACAGGCAGAAGCGTGGTGGGAATGGATACCGCCACAAGAAG  
AAATTTTTGATATTGACAATGTCTTCATGCTCAGTGAAGTTGAGGATATAGATGAGAATGGAAT  
GAAGACAGTTTGTCAATAACTTCTTCAGAAAATGAAGAAGAAGAAAATTGTTTTATGTTTTCTGG  
TCAGGAGCAGCAGCCTATTTGGAGACCAGAAAAAGAATATGAGTTTCTCTTTCCAAAAATGAAG  
ACTTTGATATGACAGATGCAGCAGAACATGAGGAGATAACCAGAACAATCAAATTTATCTGGTAAGC  
TGTGAAAAGAAGCCTTTGTATTCAGGTTTATCCAAATCATTCTAACCAAGCTATGGTAGACTGCTT  
AGTTGATACAGGTTCTACAAGGAATTTTGTACAGCCTACAATATTCTCTCAGCAGTATTGGAAAA  
GGTTAAAAATCGCCATTGGTTGGACAAGGTATGGGTGAGTATGAATACAGGTGTGATTATTATATC  
CCTGCTGCAGAACTCAAATTTGGAAAGAAAAGTTTTTTTTGCAGATTTGTATATTTGTACAGGACA  
TAAATATGATATATTGCTAGGACTTCCATTTCTAGAAAAATATTTGCCAGTGACAATACTAGATA  
ATAGTTTGATTTTAAATCATCAAGGAAACATGATAGAAGTACCAAGATTGAATTATGCTTCAATT  
CAAGACAAAGAAGATAGTCTAGATGAAGATATGTTTCAGGCTATTGAAGAACAAGAGAATCCAGA  
AGAAAAATGAATTAGATTCTCTGATAAACTTCTATCAAAAATAAAGATAAAGAAAAGAAAAGAA  
AACAGAAATGAAAGAGCAAGATGTAGATATGTACAGTTTAATTCAGATTTTAAATGTTTATTC  
TCTGGAGAAAATTCAGAAGGGTTGGAAAAAGATATTGACAGAATAACCAAACAGTTAGAAGAATG  
TTGCAGTATGAATCCTTTGGCATTTTGGGACAAGGATCAGCCTGAAGCAGAAATTGAGCTGACAG  
ATCAGAATGCTAAGGTATATGAAAAACCAATTCCTGTCTGAAAAATATAGAAAGGAAATGGAA  
ACTCAGATAGAAGAAATGTTAAAAATAGATCTGATAGAAGAAATCTAAATCACCATTCTGTGTCC  
TGCATTTATGGTTTATAAACATTTCTGAAATAAAAAGAGGAAAAGGAAGAATGGTAATAAATTATA  
AAAGGTTAAATCTGTTACCAAGAGTTTTTAATTACCCTCTTCTCATAAAGAAACATTTATTTGAA  
AGAATAGCAGGATGTCAGTATTTTTCAAAGTTTGATTGTAAATCAGGATTCTATCAGATAATGGT  
TAAAGCAGAAGACAGGTGGAAGACGACATTCTCAGCATTAAATGGTCAATTTTCAGTGGAAAGTAA  
TGCCCTTTGGTTTGA AAAAATGCTCCTGCATACTTCCAGAGAAGAAATGGATAAAAATATTTAGACAT  
ATGGATTGGTTTTTTGTGTATATAGATGACATGTTAATATTCAGTAAGACTTTAGAAGAACATGT  
ACAGCATTGAAAGAGTTTTATGAAATTTGTAAAAATCATGGTATTGTTTTGTCTTCAACAAAA  
TGGTGATCTGCAAAAAGAGATGGAATTCCTTGATTCAATATTCAGGAGGAAAAATTAATTTG  
CAAGGACATGTTTTGGAAAAAATAGATCAATTCCTGATATAATGGAAGACAAAAACAATTACA  
AAGATTTTAGGATGTTTAAATATATTGGGAATTTCTATCTTTGGTTGCTAAAGATCGGCAAG  
AATTACAGAATTTGTTAAAAAAGGATGCAGTATTTAATTGGACTTCCAGACATACTTCTTTGGTC  
AAAGCTATAAAACAAAAATGTAAACAATTGCCTTCTTTAAAAATTCAGAAGCAGGTAAACAATT  
TATTTTACAACTGATGCTTCTGACAAATATTGGGCAGCTGTTTTATTGCAGAAAAATGATCAAG  
GACAAGAAGAAGTATGTGCATATACTTCCAGGTACATTTTCTGGTAGTTCATTAATTTACACTATT  
TATGAAAAAGAAATTTCTGCTGTACAAAAAGGCATCATGAGATTCAGGATATATCTTCTCCTGA  
ACATTTTCTGGTAAGAACTGATAATAAAATGTTCAAAGCCTTCTTAAATAAAAAGATTGATAAGC  
AGATTGCAAGAGGCAGATTATTTCAGATGGCAGGCATGGTTCCAAGAATATAATTTTGATGTCGAA  
TATGTYAAAGGAGATAAAAAATATCTTCTGATGCATTGACTAGAGAAATGACATCTTTGTGTTT  
TATGAATAGAAACAGGAACCGTCCAAATGACAGGCTTAATGGTTTTGTCATTGAAGAAATGATG  
ATTTTCCATGTCTTTTGCAGAACAGTATTATACTTTTATTTGAAGGTTTATTTTTATTACCAGAA  
GATCCTATGCCAGAGTTTATAAGGAGATGTGATGCGGTAATCAGGAATATGAACCGGGATGCTGA

ATGTTGTCATTTTCAGTCTGAATTGGAAAAAGAATGAAAATGTGTCTGTTTTCTGCAAATATGAATC  
TCAATGATTATATAAAAGCAGACTCATTAATGAAATCCAAAATAATAATGGAAATTAATATTCCA  
AGGCTGGATATGAGTAATGTTTCAAGATGGTTTCGTGATTTGGATGTTTTACATTTTCCAAATAA  
ATTATGGTGGAGATATGTGAATGGGAGGAGACCATTATATGCCATTGTAAATAGTGACCATGACT  
TTTGGAGCTTGAAGAAGATGTGCCACCTCCGCCAGCATCACCATCATCATCTGAAGACCATGGA

←ORF2

TGAATGCCATGTGTAAAAGCCATGTAAATAATATTTAATGTAAAGAACTTCGGATGTAGACACT  
GGCCACAAAGAGGCTAAGACCCATCTCGAAGTTTCTAAGAGTCACTGTAGATATACTTTTACTG  
TAGACATACTTTTGACGTGTCCAATCTCGTGAAGCCTCTCCACCGCCTCAAATTTGTTATATAAG  
GAGGCTCACTTCTCATTTGGGGGCATCGAGTGTGAGTGACATTGAGTCTTGGGTGATCTAGNTA  
AGAGTCTTAGAGAGTCTGTGAGTCGAAAGTTAGTATGCTCTTCACGTGCGACCCTGTGTGATCTT  
CGTGAATCAGAAAARCTTTCATTTTTATTGTAATTAGTTTTCTCTGTCTCTGAGAATGAGTATGC  
TCTATGCTTCGCACCTTAGGGTGTCTTGGCATATCAGAAAATATTCTCAGAAACACTATTGTCTG  
TAAATGATTTTCATCTTATCTTATAAATATAAGTGT

**#Protein sequences**

> Gbilv (ORF1)

MENTSGIREVNTFSFDIEQAGPSGSKIGNPPKLHSSDVYKVNPFNLLAKLNIKKHEVTGQVQAKS  
GMQIAHLPLVLESEKEIEVLQKQNKYKYIHFGQFRIIVKALFRRGIDTPIMVALDSRWRKWKQAKI  
GSFRGNLCNGVQWGDICPNFPLEIKDTHFPTAINILVMVDGIDMLEGSSSFISINVTSV?QLTNTM  
TPLVYNPEIKDVVAVGQTNAEQIVAALNKSFGSLDNWSFNYQEIFHEKQPSSSVRIQQEDEDEEQ  
GNISLKWMPPRINRSYSLNLATSCKGIEFRGITESGEASTSGKEVAEKNPRISQTVNKNIHSD  
CLMSYVRVPMEEEEPSRIDRGRWPSFRSFSFAFSPDQNRVDHTPLVVRDARHTEQQK?SVQQRN  
WMCQWMNCAQQNMEEQTAKLDALAAQMELVSKRLAEQKKPGAQNYAAAAQNFRTOSEEIHDIER  
RQKQLVLKPKKDTKEKEIKISKIQEFPLEKSNPAYFSQTRTYKF\*

>Gbilv (ORF2)

LPTFPKQEPINFEKGETSHPVDIPAFQVNTPLGVYLTLDPCPKDAIEEIRLWISQLHNMQYLKGLG  
NVEMVLYAINLMGGTARRWWDAGTDEAQETIKQGGLTALY?ALLNEFAHSVLEEKNAKYLMEL  
ELNDFRKYDEYVCKFRELLYKARLHTDPGAKLHFVQSLKGLGPHLLTKLENQGINVRTIPFNELA  
FRCQQQIELMCLDKKAQKVLRKQGFYSCCKSFPDIPEFGRKNLYSHSKKKKSVYKPYKSRWSL  
KKVPWQKGQKAPARTFLRRRKTRRPISKKSCCFACQEQGHWAKDCPNSSKKHRTFFSTEQAEAWW  
EWIPPEEIEFDIDNVFMLEVEDIDENGNEDSLSTITSENEEEENC FMFSGQEQPIWRPEKEYE  
FLFPKIEDFDMTDAAEHEEIEPEQSNYLVSCERSLCIQVYPNHSNQAMVDCLVDTGSTRNFVQPTI  
FSQQYWKRLKSPLVGQGMGEYERYCDYYIPAAELKIGKKSFFADLYICTGHKYDILLGLPFLEKY  
LPVTILDNSLILNHQGMIEVPRNLNYASIQDKEDSLDEDMFQAIEEQENPEENELDSLINFYQNK  
DKEKKERKQKWEQDQVDMYSLIQDFNCLFSGENSEGLEKIDRITKQLEECCSMNPLAFWDKQD  
EAEIELTDQNAKVYEKPIPCPEKYRKEMETQIEELLKLDLIEESKSPFCCPAFMVYKHSEIKRKG  
GRMVINYKRLNSVTKSFNYPLPHKETLRFERIAGCQYFSKFDCKSGFYQIMVKAEDRWKTTFSALN  
GQFQWKVMPFGLKNAPAYFQRRMDKIFRHMDWFFVYIDDMLIFSKTLEEHVQHLKEFYEICNHG  
IVLSSTKMVICKEMEFLGFNIQGGKIKLQGHVLEKIDQFPDIMEDKKQLQRFLGCLNYIGNFYS  
LVAKDRQELQNLKDAVFNWTSRHTSLVKAIKQKCKQLPSLKIPEAGKQFILQTDASDKYWAAV  
LLQKNDQGQEEVCAYSFTSGSSLYTYEKEILAVQKGMRFRIYLLPEHFLVRTDNKMFKAF  
LNKKIDKQIARGRLFRWQAWFQBYNFDVEY?KGDKNYLPDALTREMTSLCFMNRNRNRPNDRLNG

FVIEEIDDFPCPFAEQYYTFIEGLFLLPEDPMPEFIRRCDAVIRNMNRDAECCHFSRIGKRMKMC  
LFSANMNLNDYIKADSLMKSKIIMEINIPRLDMSNVS RWFVIWMFSHF PNKLWWRYVNGRRPLYA  
IVNSDHD FWSLQEDVPPPPASPSSSEDHG\*
